# Supplementary material for: An early‐senescence state in aged mesenchymal stromal cells contributes to hematopoietic stem and progenitor cell clonogenic impairment through the activation of a pro‐inflammatory program
Source: PubMed Central journal article supplement (PMC6516180; doi:10.1111/acel.12933), 2019-03-03

# Figure Supplementary 1 Gnani D. et al.

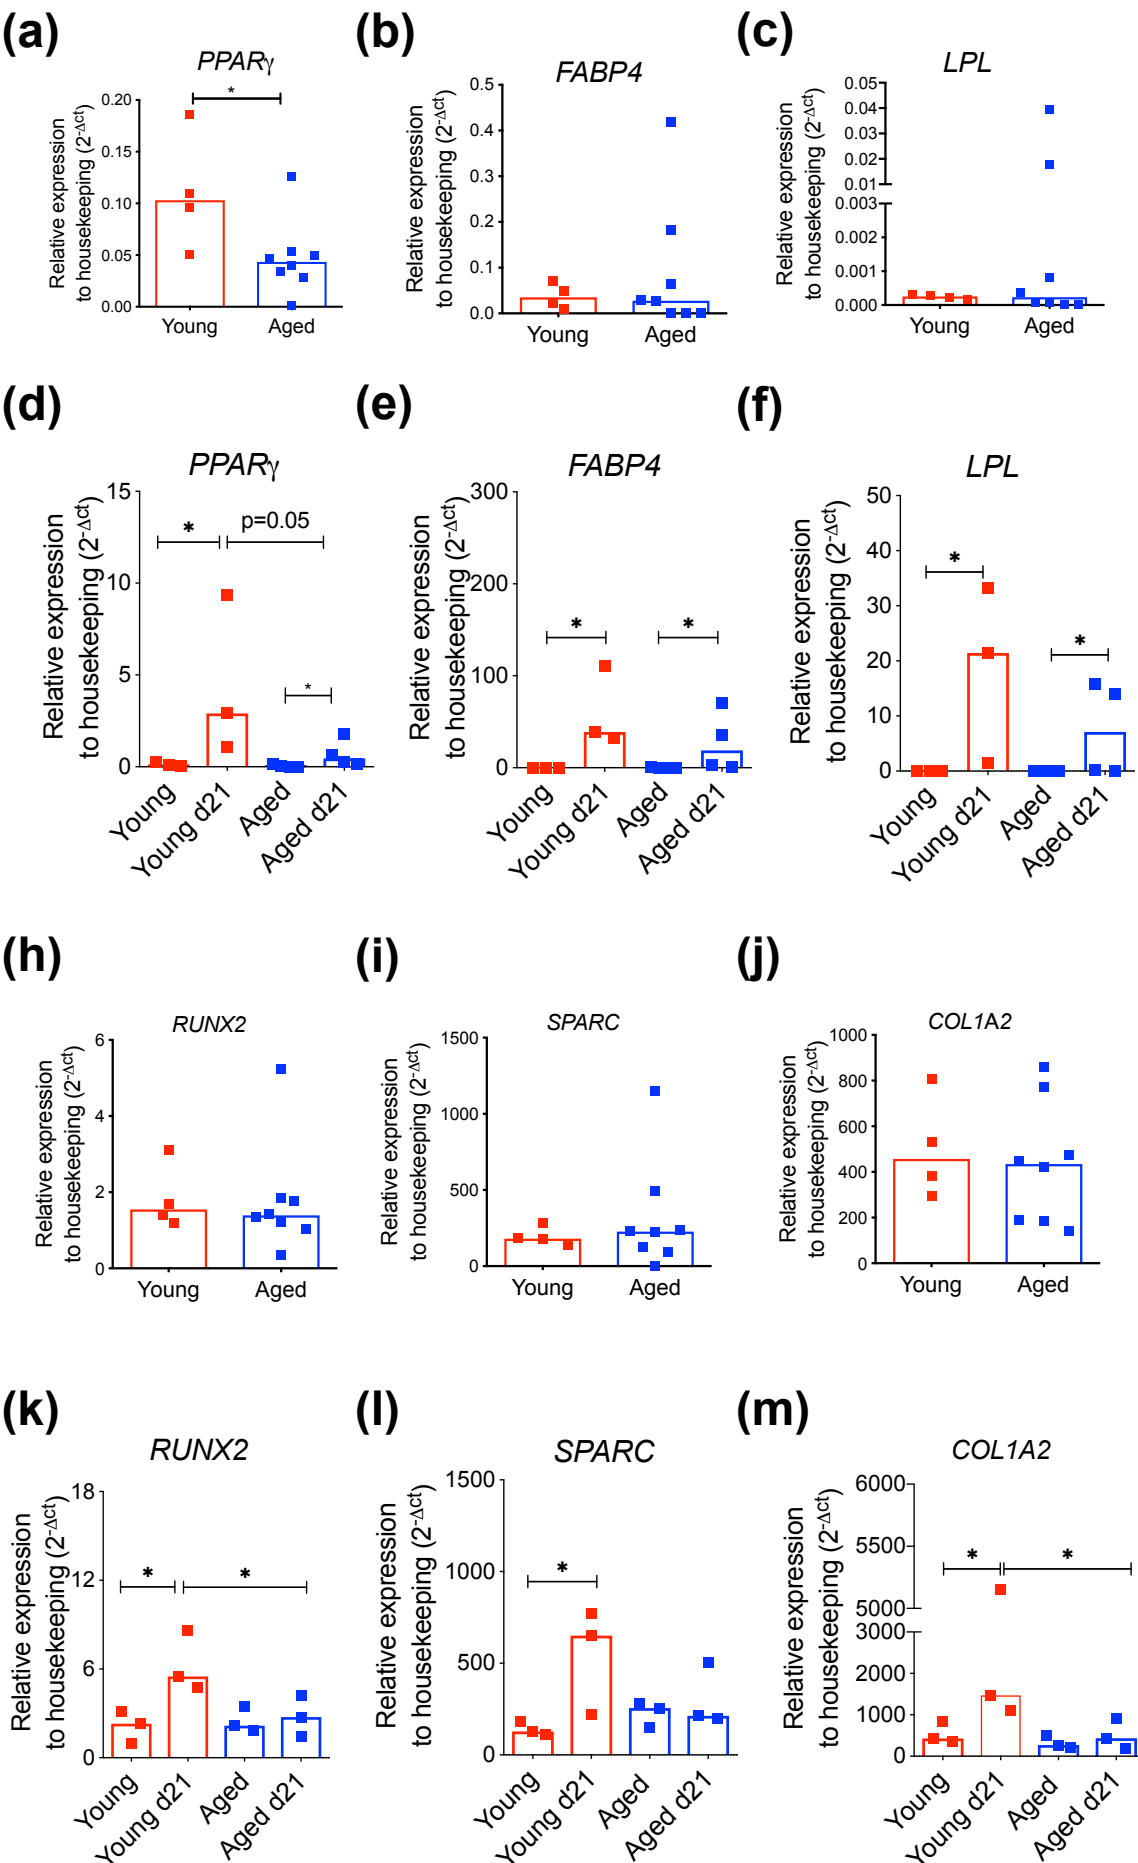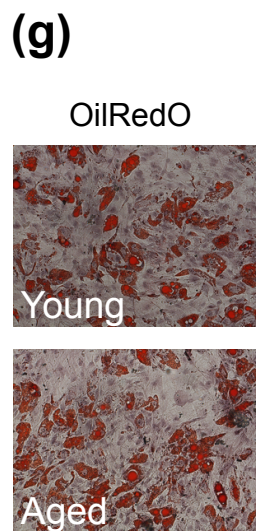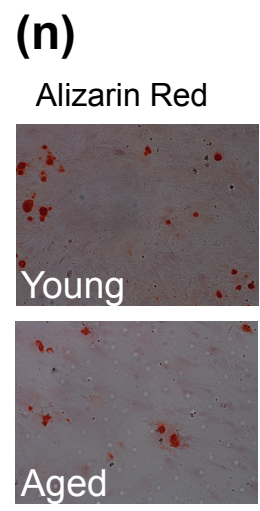

# Figure Supplementary 2 Gnani D. et al.

(a)

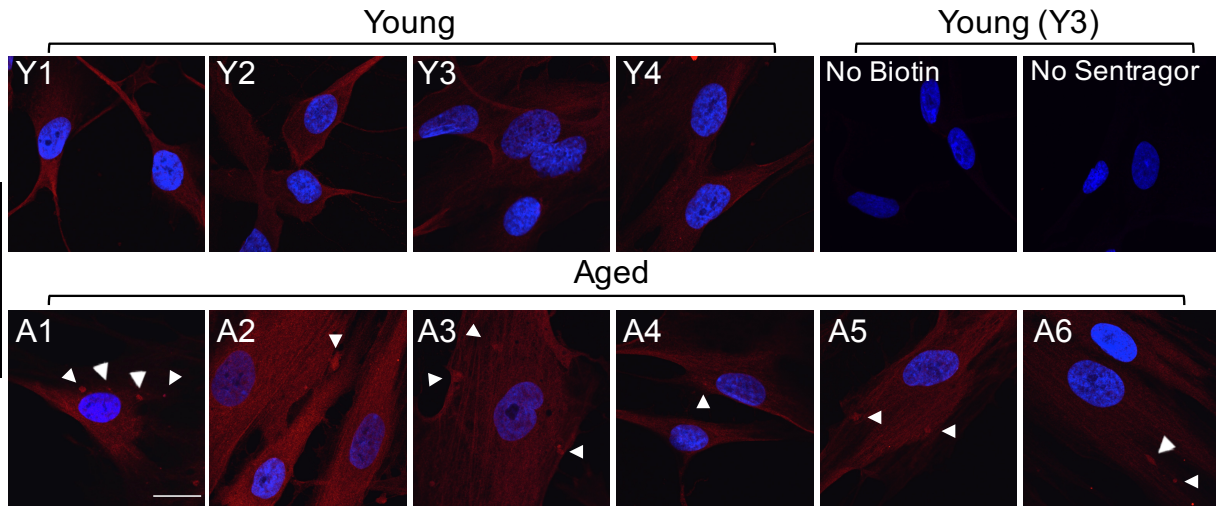

(b)

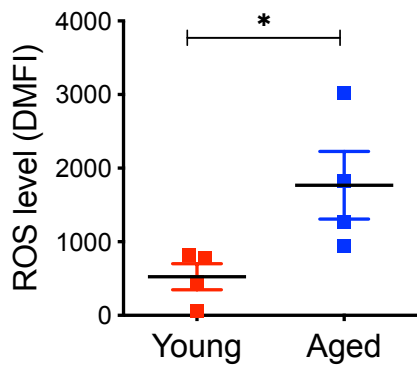

(c)

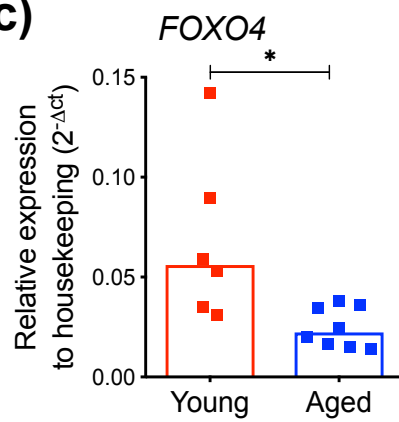

(d)

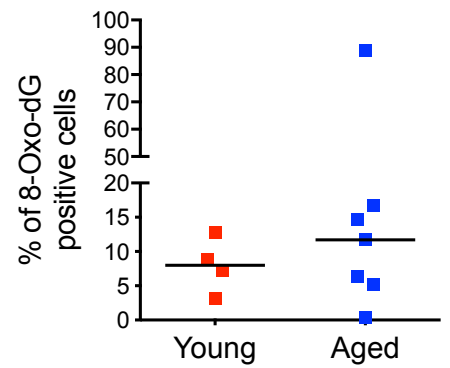

(e)

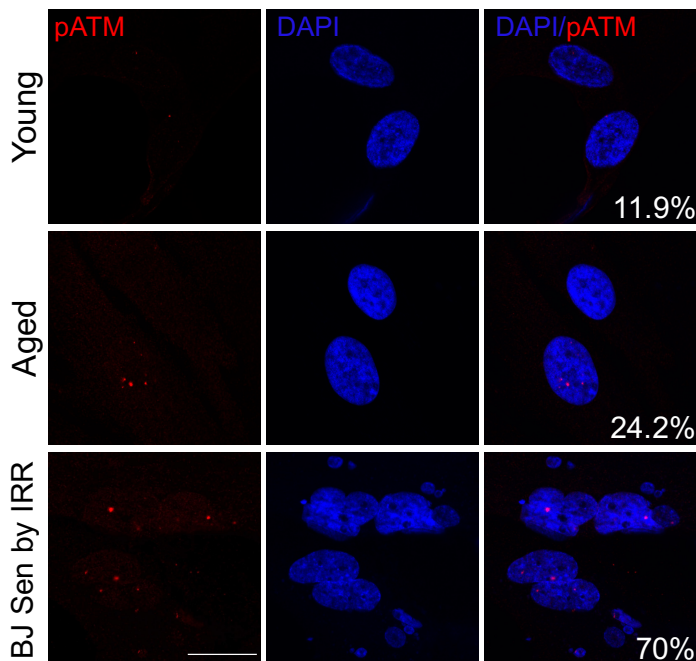

(f)

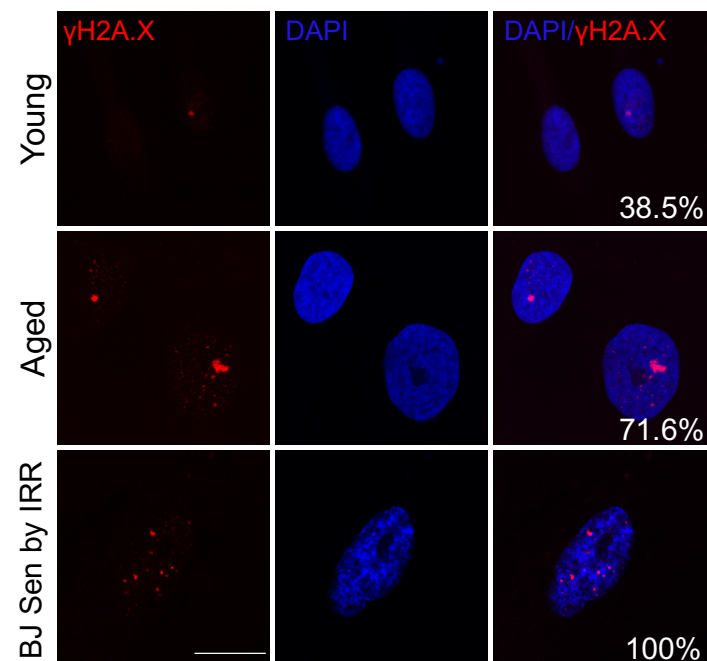

# Figure Supplementary 3 Gnani D. et al.

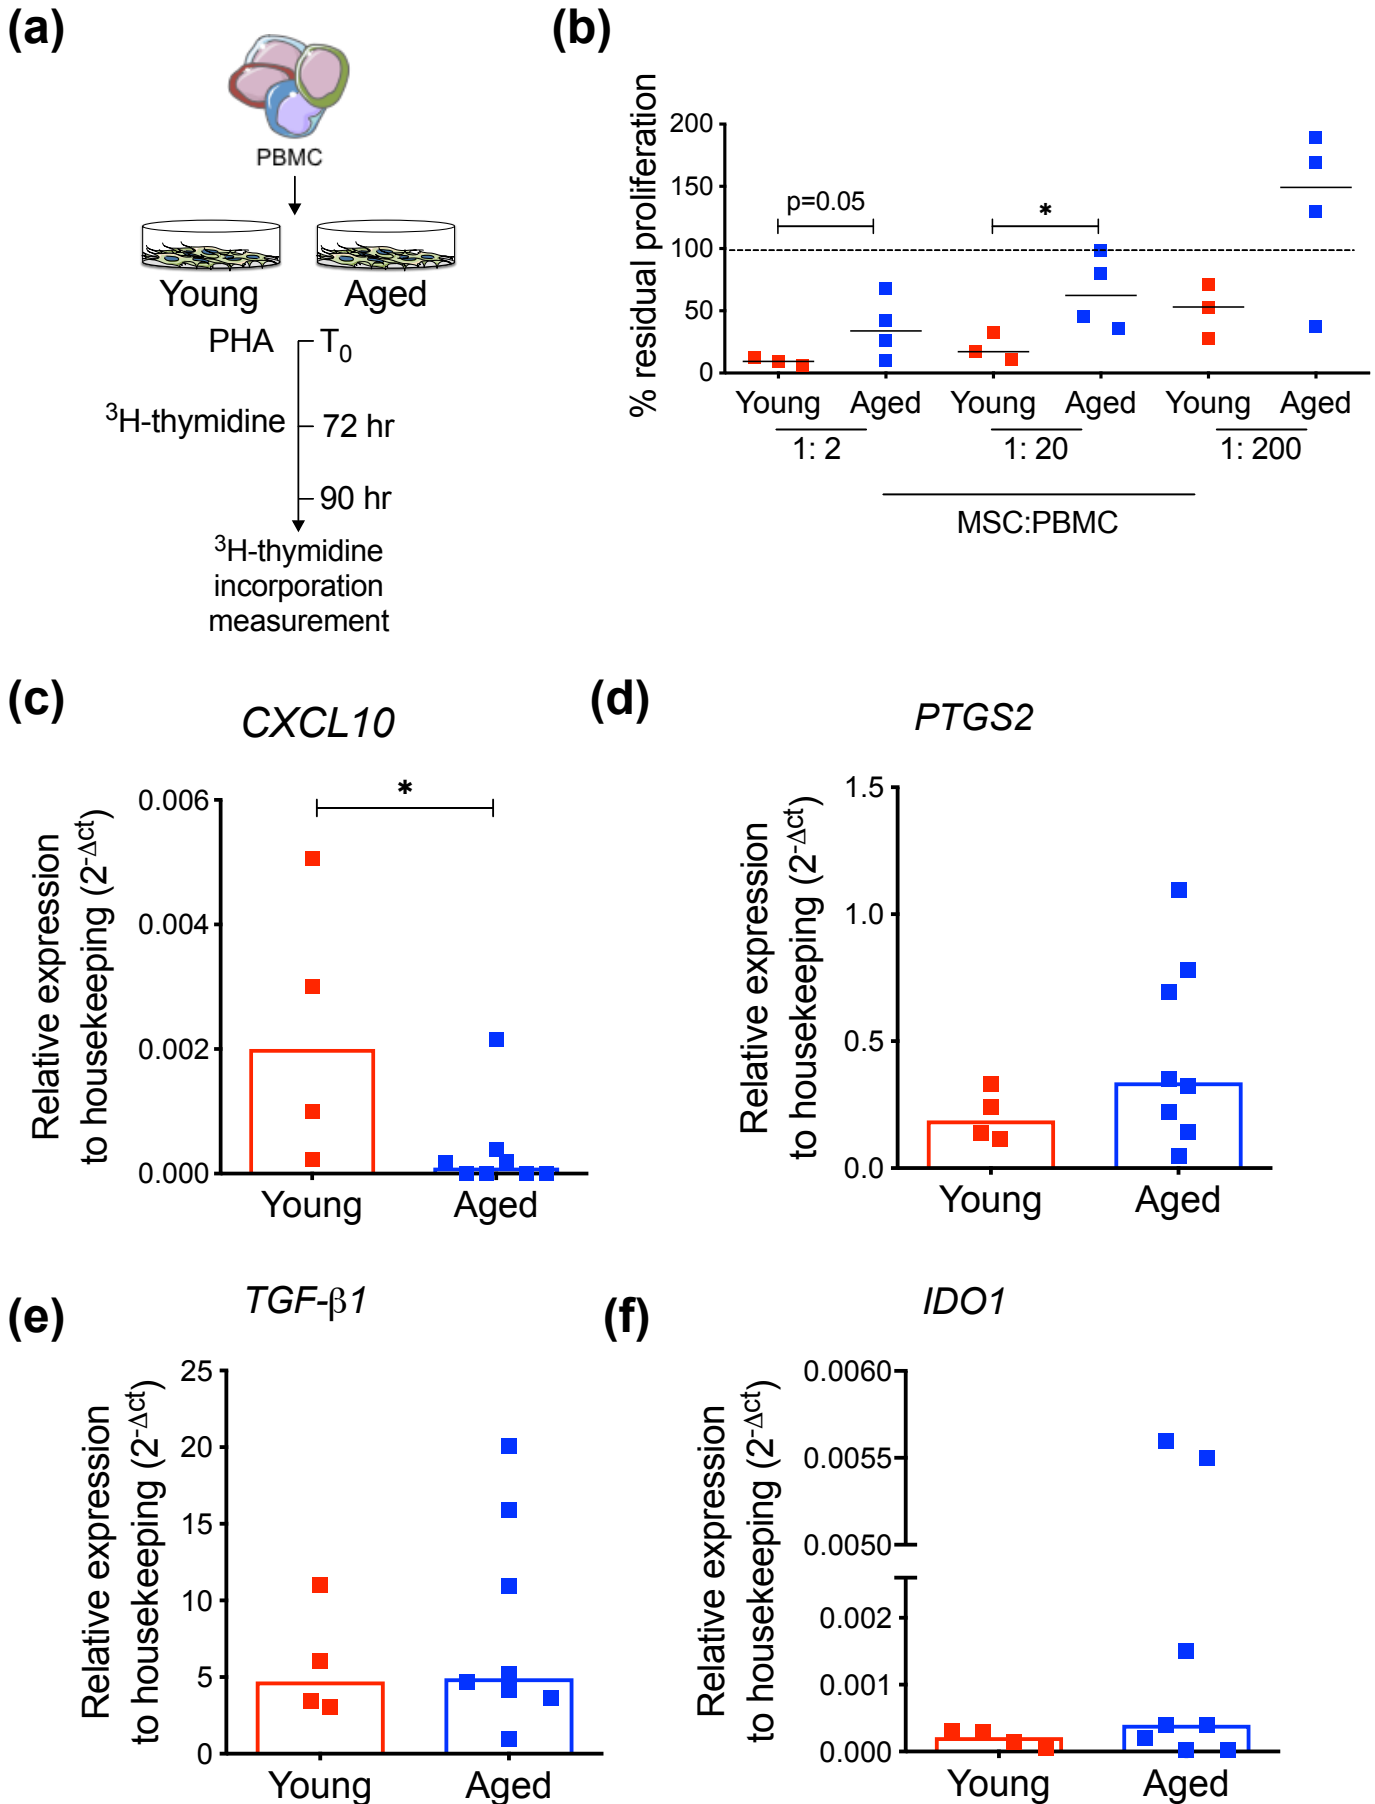

# Figure Supplementary 4 Gnani D. et al.

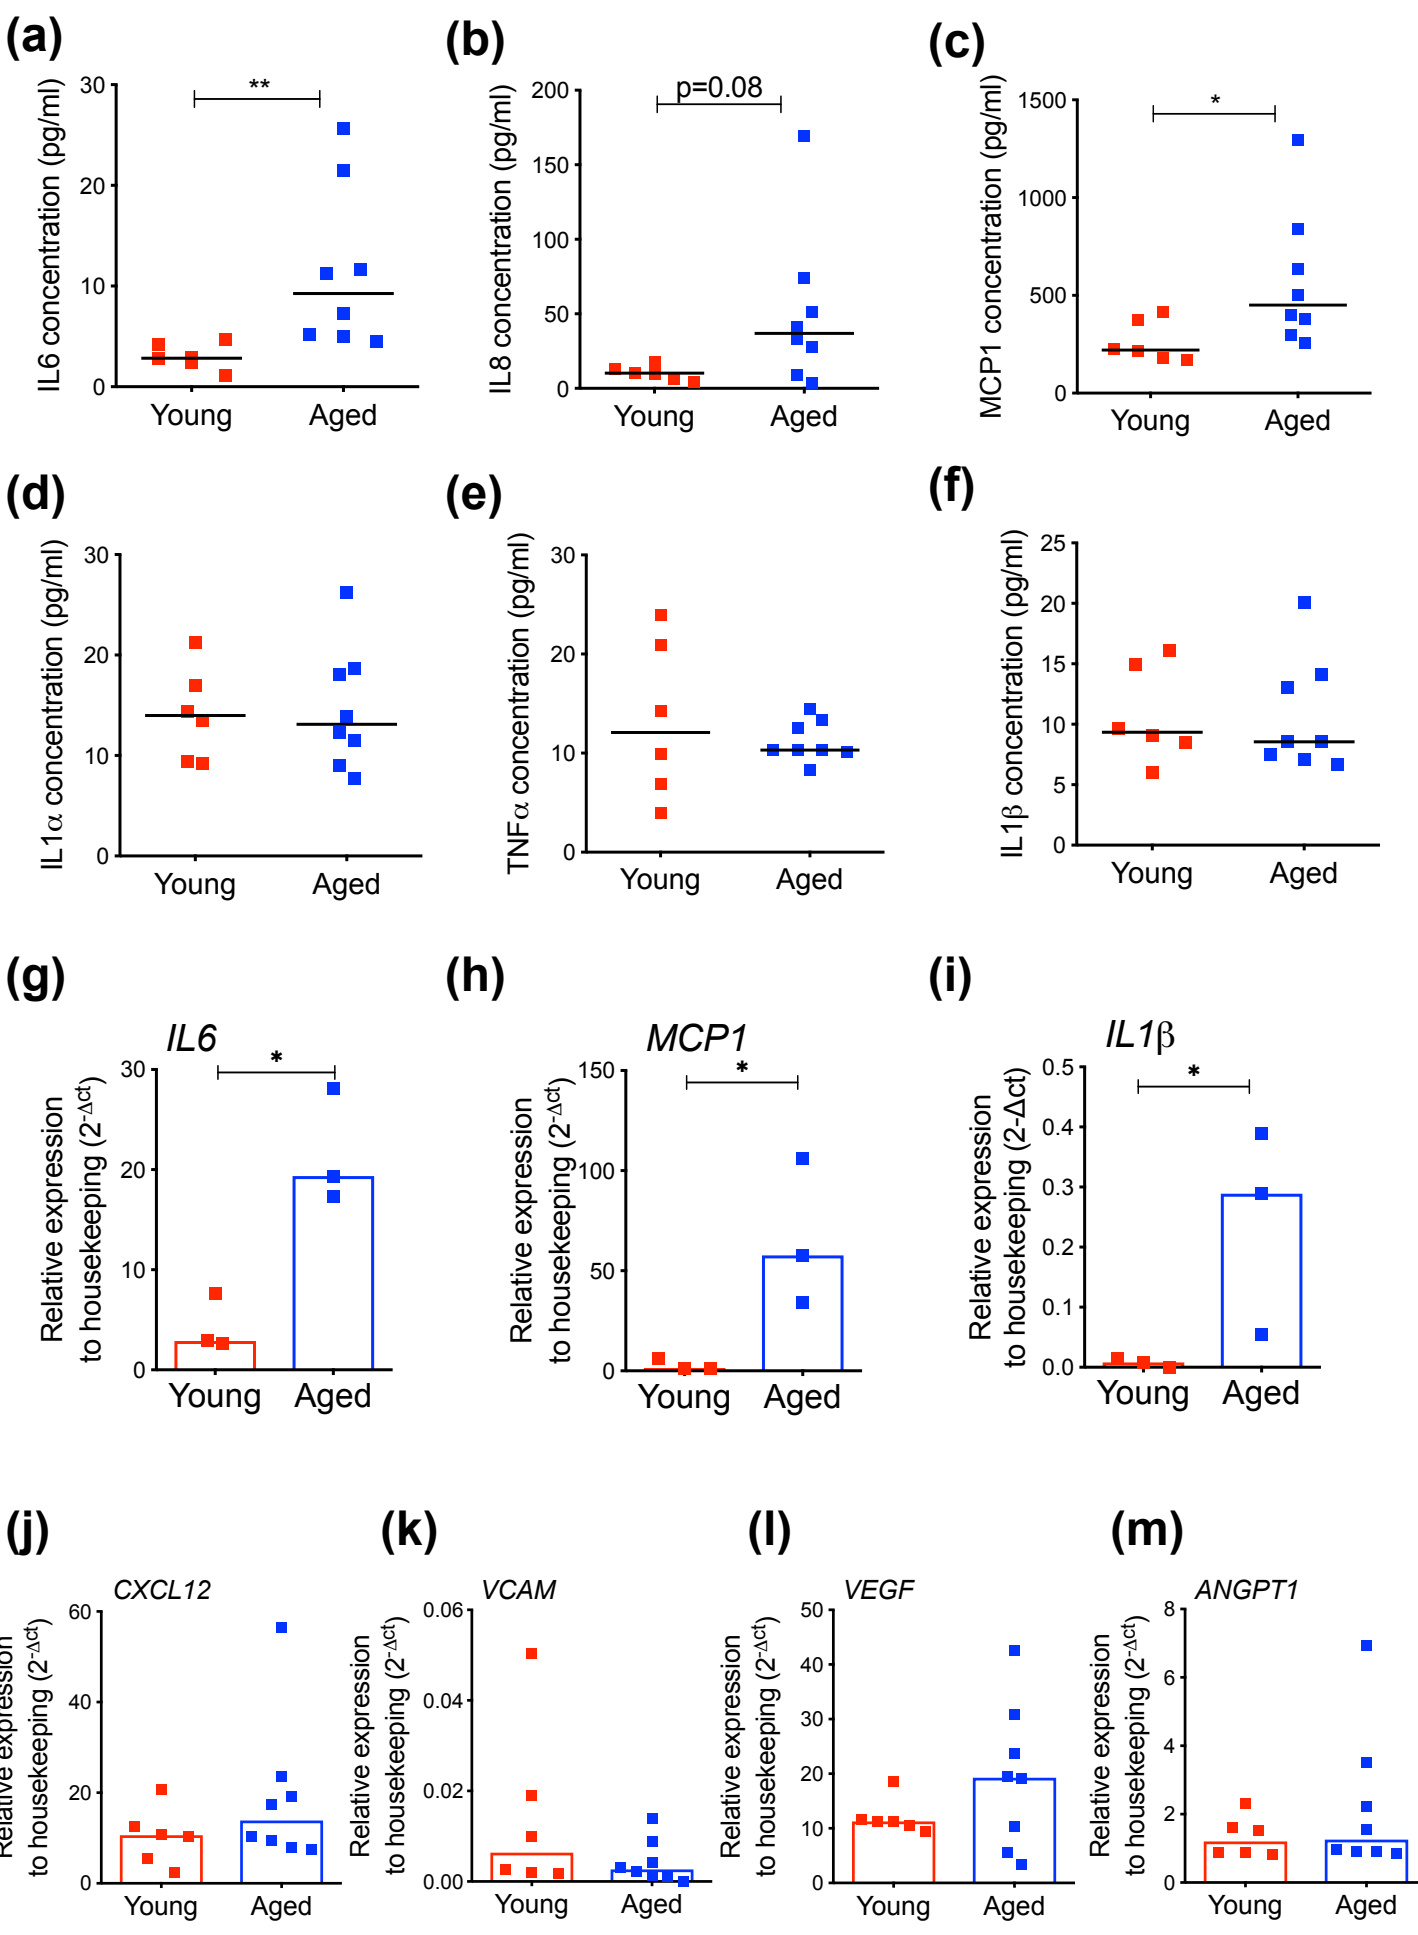

# Figure Supplementary 5 Gnani D. et al.

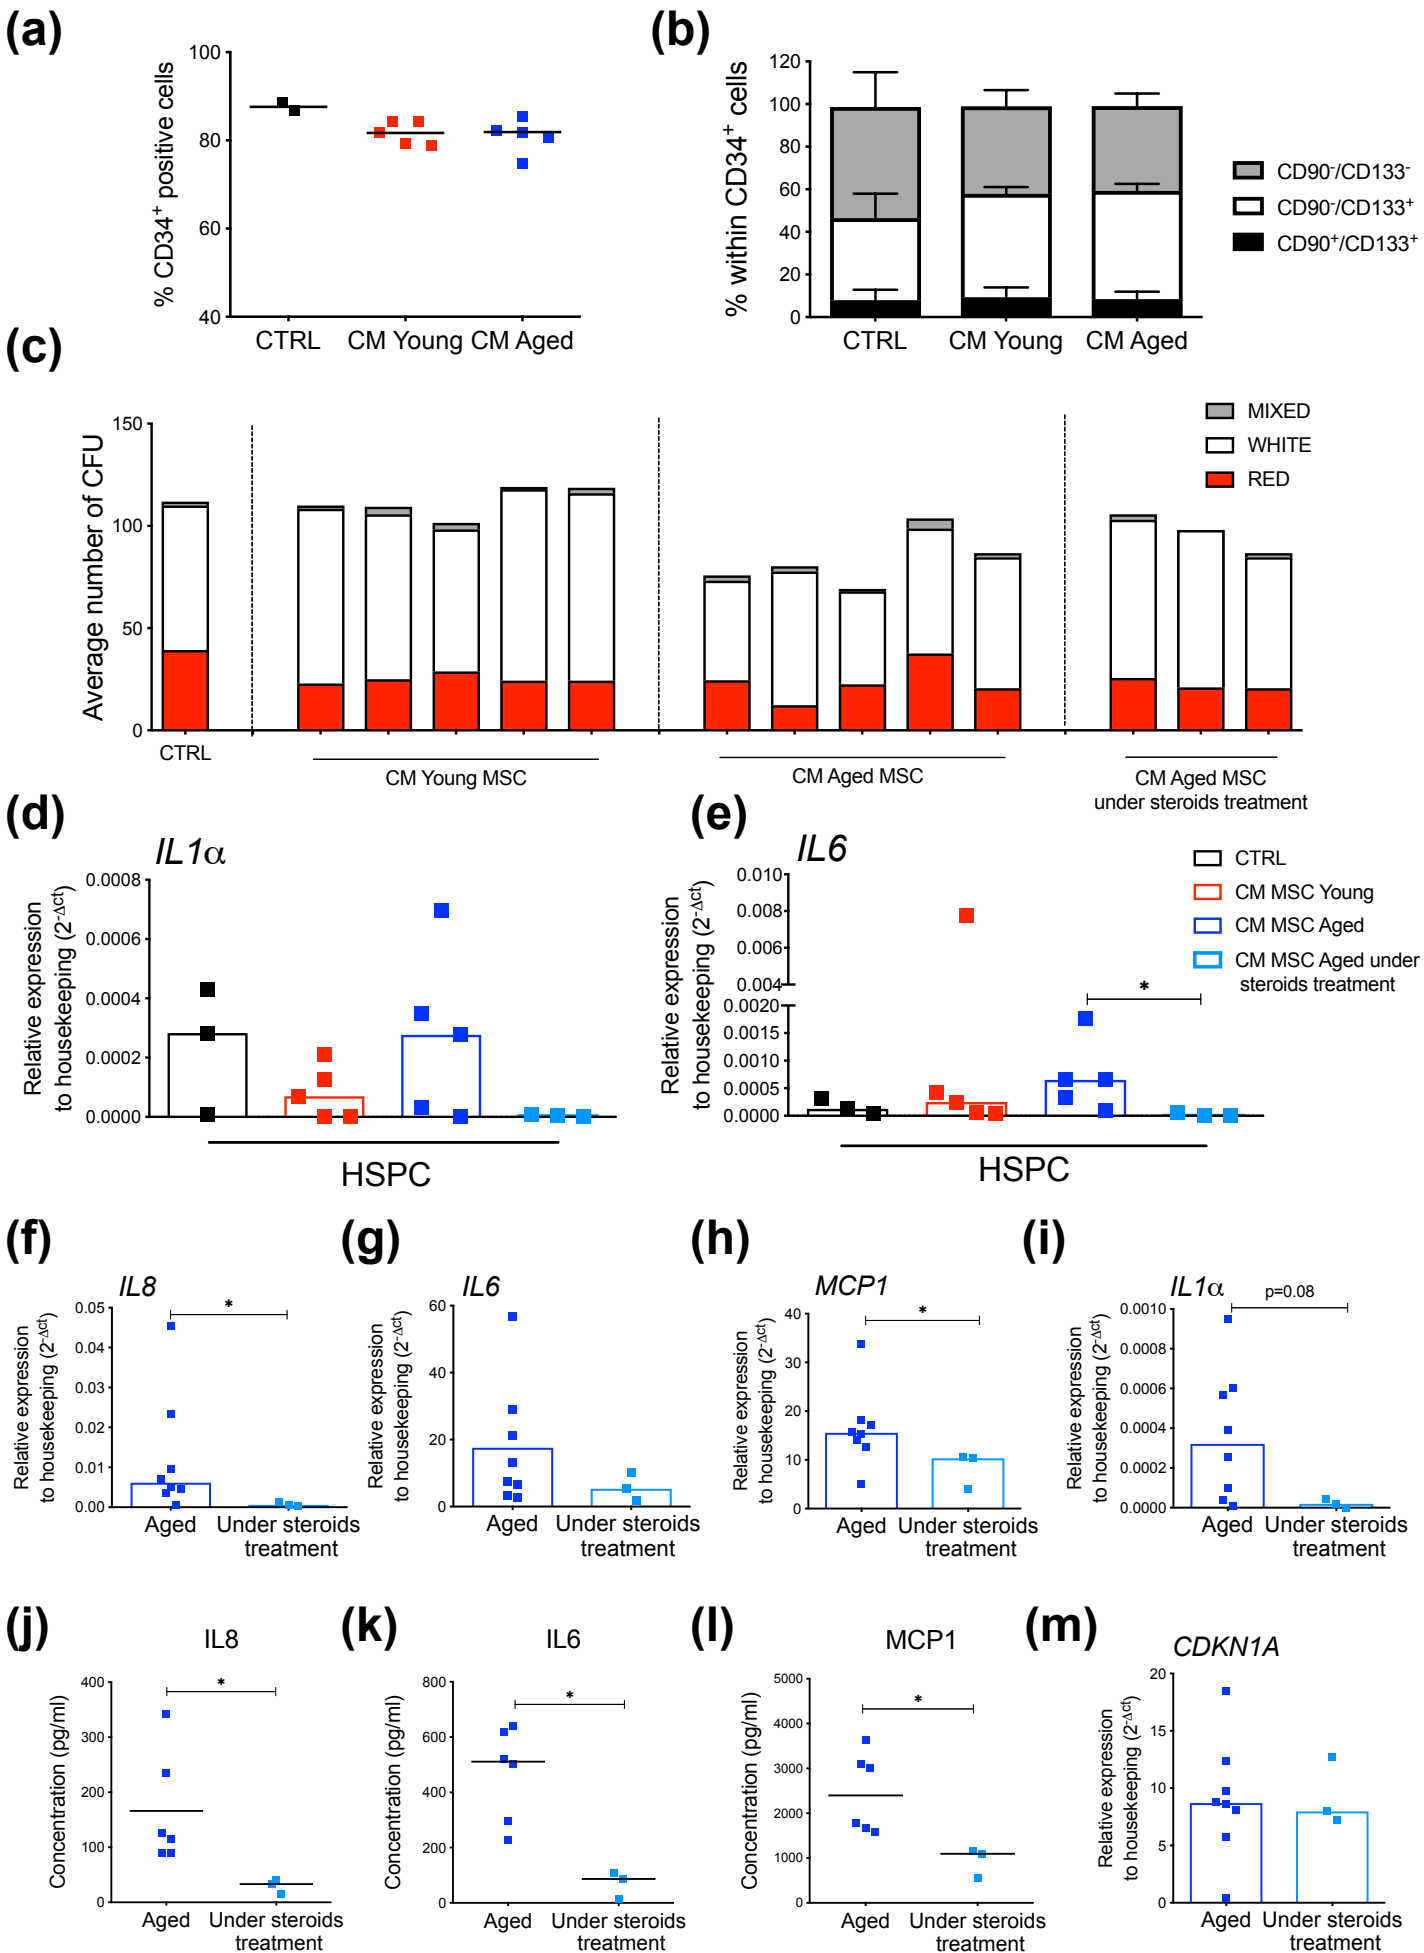

Supplement: ACEL-18-e12933-s001.pdf [file ACEL-18-e12933-s001.pdf]
